# Supplementary material for: Effect of COVID-19 Lockdown on Dietary Habits and Lifestyle of Food Science Students and Professionals from Spain
Source: MDPI journal article supplement (doi:10.3390/nu13051494), 2021-04-28
Supplement: s1 [file s1]

**Table S1. Questionnaire**

| Questions                                                        | Answers                                                                      |
|------------------------------------------------------------------|------------------------------------------------------------------------------|
| <b>SOCIODEMOGRAPHIC DATA</b>                                     |                                                                              |
| Gender                                                           | Woman / Man / Other                                                          |
| Age range                                                        | 18-25 / 26-35 / 36-55 / 56-65 / >65                                          |
| Height                                                           | Open Answer                                                                  |
| Current weight                                                   | Open Answer                                                                  |
| Collective                                                       | Student / Professional                                                       |
| If student, which study program                                  | BSc in HND/ BSc in FST / BSc in CSG /<br>Postgraduate                        |
| Province of residence                                            | Open Answer                                                                  |
| Marital status                                                   | Single / Married / Living as a Couple /<br>Divorced / Widowed / Other        |
| Living in habitual residence                                     | Yes / No                                                                     |
| Cohabitants                                                      | Alone / Couple & Children / Parents &<br>Siblings / Couple / Friends / Other |
| <b>FREQUENCY OF FOOD CONSUMPTION AND CULINARY HABITS</b>         |                                                                              |
| Fruit                                                            |                                                                              |
| Natural fruit juice                                              |                                                                              |
| Raw vegetables                                                   |                                                                              |
| Cooked vegetables                                                |                                                                              |
| White meat                                                       |                                                                              |
| Red meat                                                         |                                                                              |
| Processed meat                                                   |                                                                              |
| Plant-based meat alternatives                                    |                                                                              |
| White fish                                                       |                                                                              |
| Fatty fish                                                       |                                                                              |
| Legumes                                                          |                                                                              |
| Eggs                                                             |                                                                              |
| Milk                                                             |                                                                              |
| Plant-based milk alternatives                                    |                                                                              |
| Yogurt or kefir                                                  | Never / ≤ 1 a month / 2-3 a month / 1s week /                                |
| Cheese                                                           | 2-3 a week / 4-6 a week / Every day / >1 a day                               |
| White bread                                                      |                                                                              |
| Whole-wheat bread                                                |                                                                              |
| Rice, pasta and potatoes                                         |                                                                              |
| Whole-wheat pasta and cereals                                    |                                                                              |
| Pizza                                                            |                                                                              |
| Industrial pastries                                              |                                                                              |
| Homemade pastries                                                |                                                                              |
| Nuts                                                             |                                                                              |
| Chocolate                                                        |                                                                              |
| Salty snacks                                                     |                                                                              |
| Sweetened and Soft drinks                                        |                                                                              |
| Non-alcoholic beverages (water, tea, coffee)                     |                                                                              |
| Fermented alcoholic beverages                                    |                                                                              |
| High-grade alcoholic beverages                                   |                                                                              |
| Have you changed the fat used for cooking<br>during confinement? | Yes / No / Sometimes                                                         |

|                                                                                                                                                                                                                                                                                                                                                                                                                                                                                                                                                                                                                                                                                                                                   |                                                                                                                                                                                                                                           |
|-----------------------------------------------------------------------------------------------------------------------------------------------------------------------------------------------------------------------------------------------------------------------------------------------------------------------------------------------------------------------------------------------------------------------------------------------------------------------------------------------------------------------------------------------------------------------------------------------------------------------------------------------------------------------------------------------------------------------------------|-------------------------------------------------------------------------------------------------------------------------------------------------------------------------------------------------------------------------------------------|
| <p>If affirmative, in which way</p> <p>Which meals do you usually take?</p> <p style="padding-left: 40px;">Breakfast</p> <p style="padding-left: 40px;">Mid-day snack</p> <p style="padding-left: 40px;">Lunch</p> <p style="padding-left: 40px;">Mid-afternoon snack</p> <p style="padding-left: 40px;">Dinner</p> <p style="padding-left: 40px;">Late-night snack</p> <p>At what time did you usually take the first meal of the day before confinement?</p> <p>At what time did you usually take the last meal of the day before confinement?</p> <p>At what time did you usually take the first meal of the day during confinement?</p> <p>At what time did you usually take the last meal of the day during confinement?</p> | <p>More extra virgin olive oil / Less extra virgin olive oil / More olive oil / Less olive oil / More seed oils / Less seed oils / More butter or margarine / Less butter or margarine</p> <p>Before Confinement / During Confinement</p> |
|                                                                                                                                                                                                                                                                                                                                                                                                                                                                                                                                                                                                                                                                                                                                   | Open Answer                                                                                                                                                                                                                               |
| <b>GENERAL EATING HABITS</b>                                                                                                                                                                                                                                                                                                                                                                                                                                                                                                                                                                                                                                                                                                      |                                                                                                                                                                                                                                           |
| <p>Do you think you have gained weight during confinement?</p> <p>Did you follow a vegetarian/vegan diet during confinement?</p> <p>During confinement I have cooked more than before</p> <p>During confinement I have often tried to make new recipes</p> <p>During confinement I have eaten more fried foods</p> <p>During confinement I have used food delivery services more than before</p> <p>During confinement I have drunk more water than before</p> <p>During confinement I have drunk more tea or coffee than before</p> <p>During confinement I have drunk more alcoholic beverages</p> <p>Have you taken some kind of dietetic supplement during confinement?</p> <p>If affirmative, which one?</p>                 | <p>Yes / No / No change / DK</p> <p>Yes, always / Yes, I started now / No, I quitted now / No, never</p> <p>Totally disagree 1 – 5 Totally agree</p> <p>Yes / No</p> <p>Open Answer</p>                                                   |
| <b>LIFESTYLE</b>                                                                                                                                                                                                                                                                                                                                                                                                                                                                                                                                                                                                                                                                                                                  |                                                                                                                                                                                                                                           |
| <p>How many times a week have you exposed yourself to sunlight for at least 15 minutes?</p> <p>How often do you do at least 30 minutes of exercise or sport...</p> <p style="padding-left: 40px;">...Before confinement?</p> <p style="padding-left: 40px;">...During confinement?</p> <p>In total, how much time a day do you spend on sedentary activities...</p> <p style="padding-left: 40px;">...Before confinement?</p>                                                                                                                                                                                                                                                                                                     | <p>Never / 1-3 days / 4-6 days / Every day</p> <p>&lt; 1s a week / 1s a week / 2-3 days a week / 4-6 days a week / Every day</p> <p>&lt; 1h / 1-2h / 3-4h / 5-7h / ≥8h</p>                                                                |

|                                                                                          |                                                                        |
|------------------------------------------------------------------------------------------|------------------------------------------------------------------------|
| ...During confinement?                                                                   |                                                                        |
| Do you usually smoke?                                                                    | Yes / No                                                               |
| If affirmative, during confinement you smoke...                                          | More than before / The same / Less than before / I quitted / I started |
| In relation with your sleeping habits, during confinement...                             |                                                                        |
| On weekdays I wake up                                                                    | Earlier than before / Later than before / At the same time             |
| On weekdays I go to sleep                                                                |                                                                        |
| On weekends I wake up                                                                    |                                                                        |
| On weekends I go to sleep                                                                |                                                                        |
| During confinement, my sleep quality is...                                               | Better than before / The same / Worse than before                      |
| During confinement, the number of hours dedicated to your work or student activity is... | Higher than before / The same / Lower than before                      |
| During confinement I try to purchase more local products                                 | Yes / No / The same                                                    |
| During confinement I have changed the way I treat food after buying it                   | Yes / No / Sometimes                                                   |
| During confinement, I leave some food in quarantine before consuming it                  | Yes / No / Sometimes                                                   |

**Table S2.** Percentage of the sample that reported the frequency of consumption, before and during confinement, for each foodstuff.

| Foodstuff                     | Never       | ≤ 1/month   | 2-3/month   | 1/week      | 2-3/week    | 4-6/week    | Every day   | >1/day      |
|-------------------------------|-------------|-------------|-------------|-------------|-------------|-------------|-------------|-------------|
| Fruit                         | 0.9   0.9 * | 4.4   3.4   | 2.5   1.9   | 5.9   3.4   | 8.7   10.3  | 13.1   10.9 | 23.4   27.4 | 41.1   41.7 |
| Natural Fruit Juice           | 33.0   36.1 | 28.7   24.6 | 13.1   9.3  | 5.9   7.2   | 8.4   9.0   | 4.4   4.7   | 5.6   7.8   | 0.9   1.2   |
| Raw Vegetables                | 1.2   1.2   | 3.7   2.8   | 5.3   3.7   | 10.3   9.3  | 19.9   16.5 | 18.4   21.5 | 24.3   27.1 | 16.8   17.8 |
| Cooked Vegetables             | 0.6   0.6   | 2.2   1.2   | 4.0   3.1   | 5.6   5.3   | 18.4   15.9 | 20.9   21.2 | 30.2   30.5 | 18.1   22.1 |
| White Meat                    | 13.1   14.0 | 2.5   1.9   | 4.7   5.3   | 18.1   17.4 | 40.5   39.3 | 16.8   16.8 | 3.1   4.4   | 1.2   0.9   |
| Red Meat                      | 16.2   16.5 | 10.9   8.4  | 11.2   11.5 | 31.5   33.3 | 25.9   26.2 | 4.0   3.7   | 0.3   0.3   | -           |
| Processed Meat                | 21.2   22.1 | 16.5   15.6 | 11.5   8.7  | 20.9   19.3 | 15.0   19.6 | 9.3   8.7   | 5.6   5.6   | -   0.3     |
| Plant-Based Meat Alternatives | 48.0   49.2 | 16.2   14.6 | 9.3   10.0  | 8.1   7.8   | 8.7   7.5   | 6.2   7.2   | 2.8   3.1   | 0.6   0.6   |
| White Fish                    | 14.3   1.3  | 8.1   7.5   | 12.5   11.2 | 32.1   32.1 | 29.0   30.8 | 3.4   4.7   | 0.6   0.6   | -           |
| Blue Fish                     | 11.5   11.8 | 9.7   6.9   | 13.1   13.1 | 34.3   31.8 | 28.0   31.5 | 2.8   4.0   | 0.6   0.9   | -           |
| Legumes                       | 0.9   0.9   | 5.6   3.7   | 10.6   7.2  | 27.4   27.1 | 36.1   40.2 | 13.7   14.6 | 5.3   5.3   | 0.3   0.9   |
| Eggs                          | 3.7   3.4   | 1.6   1.6   | 4.4   4.7   | 25.9   19.0 | 44.9   43.9 | 14.0   20.9 | 4.7   5.6   | 0.9   0.9   |
| Milk                          | 23.7   25.2 | 9.0   6.2   | 4.4   4.0   | 3.1   5.3   | 6.9   5.6   | 6.9   7.5   | 35.5   32.7 | 10.6   13.4 |
| Plant-Based Milk Alternatives | 51.1   50.5 | 12.1   11.8 | 3.1   2.2   | 2.8   5.0   | 5.0   4.4   | 6.2   5.9   | 14.6   14.3 | 5.0   5.9   |
| Yogurt and Kefir              | 14.3   13.7 | 7.5   6.5   | 8.7   6.2   | 9.0   6.9   | 23.4   20.9 | 12.5   19.9 | 21.5   22.1 | 3.1   3.7   |
| Cheese                        | 8.7   8.4   | 4.4   4.4   | 4.4   4.4   | 12.5   10.6 | 26.5   25.9 | 23.4   26.5 | 17.1   16.5 | 3.1   3.4   |

|                                  |             |             |             |             |             |             |             |             |
|----------------------------------|-------------|-------------|-------------|-------------|-------------|-------------|-------------|-------------|
| White Flour Bread                | 12.8   13.7 | 12.8   9.0  | 5.9   7.8   | 11.2   12.8 | 16.5   18.1 | 15.6   11.8 | 19.0   19.0 | 5.9   7.8   |
| Whole-Wheat Bread                | 15.6   19.6 | 14.0   11.2 | 9.0   8.4   | 11.2   9.3  | 15.3   16.8 | 14.3   15.0 | 18.7   17.4 | 1.9   2.2   |
| Rice and White Flour Pasta       | 2.5   2.5   | 3.1   1.9   | 5.3   6.2   | 15.6   17.8 | 37.7   38.0 | 24.3   22.7 | 9.3   8.7   | 2.2   2.2   |
| Brown Rice and Whole-Wheat Pasta | 25.2   25.9 | 16.8   14.0 | 9.3   10.9  | 17.4   17.4 | 17.1   18.7 | 10.0   10.3 | 2.8   2.2   | 1.2   0.6   |
| Pizza                            | 7.5   12.1  | 29.3   23.7 | 24.6   24.0 | 35.8   36.8 | 2.5   3.1   | 0.3   0.3   | -           | -           |
| Industrial Pastries              | 23.1   22.1 | 25.9   27.1 | 17.8   16.2 | 12.5   14.3 | 11.8   9.3  | 5.3   6.5   | 2.8   4.0   | 0.9   0.3   |
| Homemade Pastries                | 27.7   15.0 | 38.3   20.6 | 18.1   25.5 | 10.0   19.3 | 4.7   14.0  | 0.9   4.0   | 0.3   1.2   | -   0.3     |
| Nuts                             | 4.7   6.5   | 15.3   11.2 | 10.6   11.2 | 12.5   14.0 | 21.2   18.7 | 13.4   15.0 | 18.7   18.1 | 3.7   5.3   |
| Chocolate                        | 6.9   6.9   | 13.7   11.8 | 13.4   8.4  | 11.8   15.0 | 18.7   14.6 | 13.7   16.2 | 19.3   22.1 | 2.5   5.0   |
| Salty Snacks                     | 20.2   20.9 | 29.3   21.5 | 15.0   13.7 | 22.7   21.8 | 11.5   17.1 | 0.9   4.9   | 0.3   0.9   | -           |
| Soft Drinks                      | 51.7   54.8 | 25.9   20.9 | 9.3   9.3   | 5.9   7.8   | 3.7   3.4   | 1.9   2.5   | 1.2   0.9   | 0.3   0.3   |
| Non-Alcoholic Beverages          | 2.5   3.4   | 3.1   2.5   | 3.1   1.9   | 1.6   1.2   | 2.2   2.8   | 4.4   3.4   | 25.5   24.0 | 57.6   60.7 |
| Fermented Alcoholic Beverages    | 21.8   39.6 | 20.9   15.9 | 12.1   9.3  | 17.4   12.5 | 17.4   10.9 | 6.2   7.5   | 4.0   4.0   | -   0.3     |
| High-Grade Beverages             | 38.9   73.8 | 34.9   16.5 | 17.4   6.9  | 5.6   1.9   | 2.2   0.9   | 0.9   -     | -           | -           |

\* Before Lockdown | During Lockdown.
